# Supplementary material
Source: Research Square preprint supplement (doi:10.21203/rs.3.rs-9104558/v1)
Supplement: Supplementary file 1 [file 3d49a337c2efa4237a070f5e.docx]

# **Supplementary information**

**Sustainable Lignin–Acrylonitrile Copolymers via Aqueous Free Radical Polymerization for Carbon Materials Development**

Marta C. Lourenço1, Talita Nascimento1, Ana C. Marques2, Marta Ramos-Andrés1,3

1Centro de Recursos Naturais e Ambiente (CERENA), Instituto Superior Técnico, Universidade de Lisboa, Avenida Rovisco Pais, 1049-001 Lisbon, Portugal

2CERENA, Department of Chemical Engineering, Instituto Superior Técnico, Universidade de Lisboa, Avenida Rovisco Pais, 1049-001 Lisbon, Portugal

3Bioeconomy Institute of the University of Valladolid (BioEcoUVa), PressTech Group, Department of Chemical Engineering and Environmental Technology, School of Industrial Engineering, University of Valladolid, Paseo Prado de la Magdalena 3-5, 47011 Valladolid, Spain


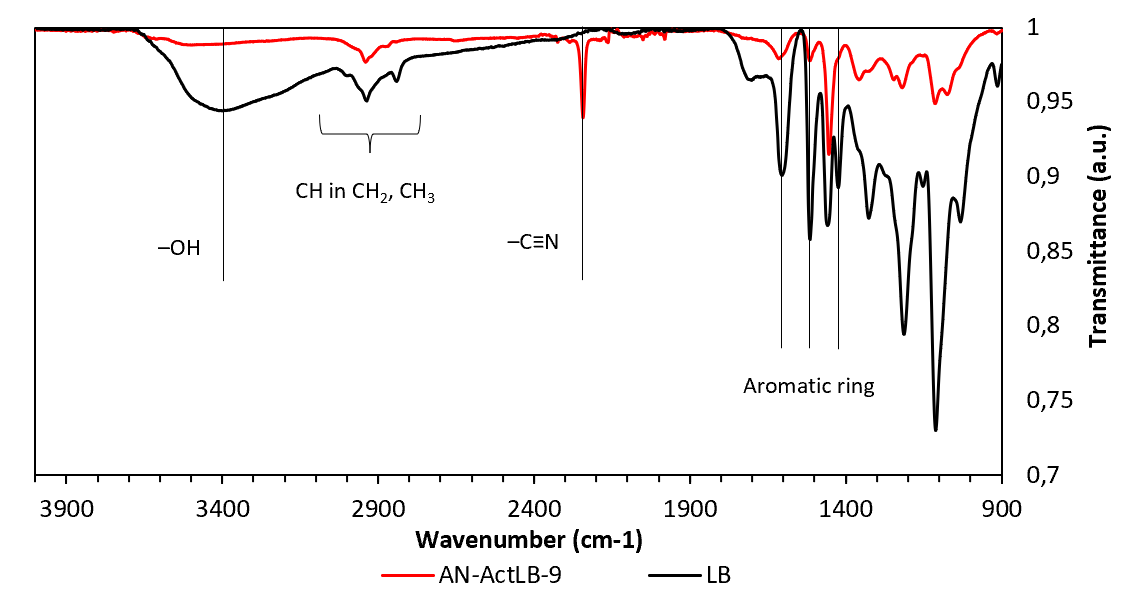


Figure SI.1 – ATR-FTIR spectra of LB and AN-ActLB-9.


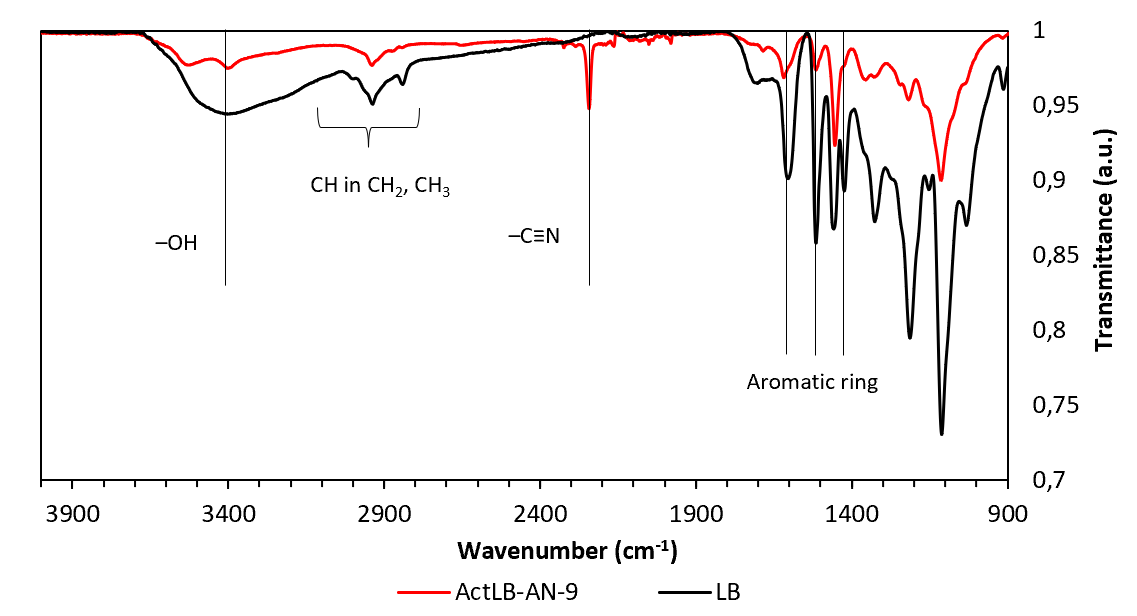


Figure SI.2 – ATR-FTIR spectra of LB and ActLB-AN-9.


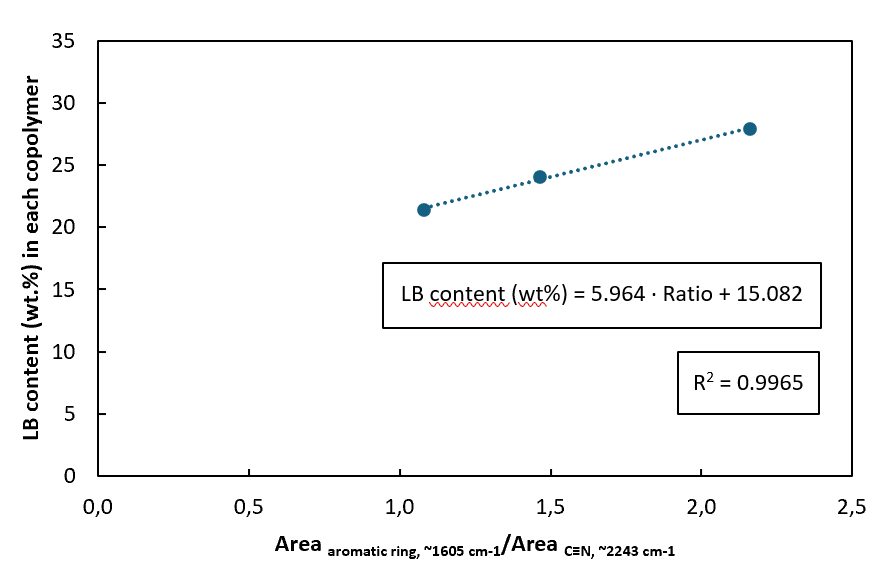


Figure SI.3 – Correlation between lignin incorporation in copolymers and the area ratio of aromatic to nitrile groups in ATR-FTIR spectra.


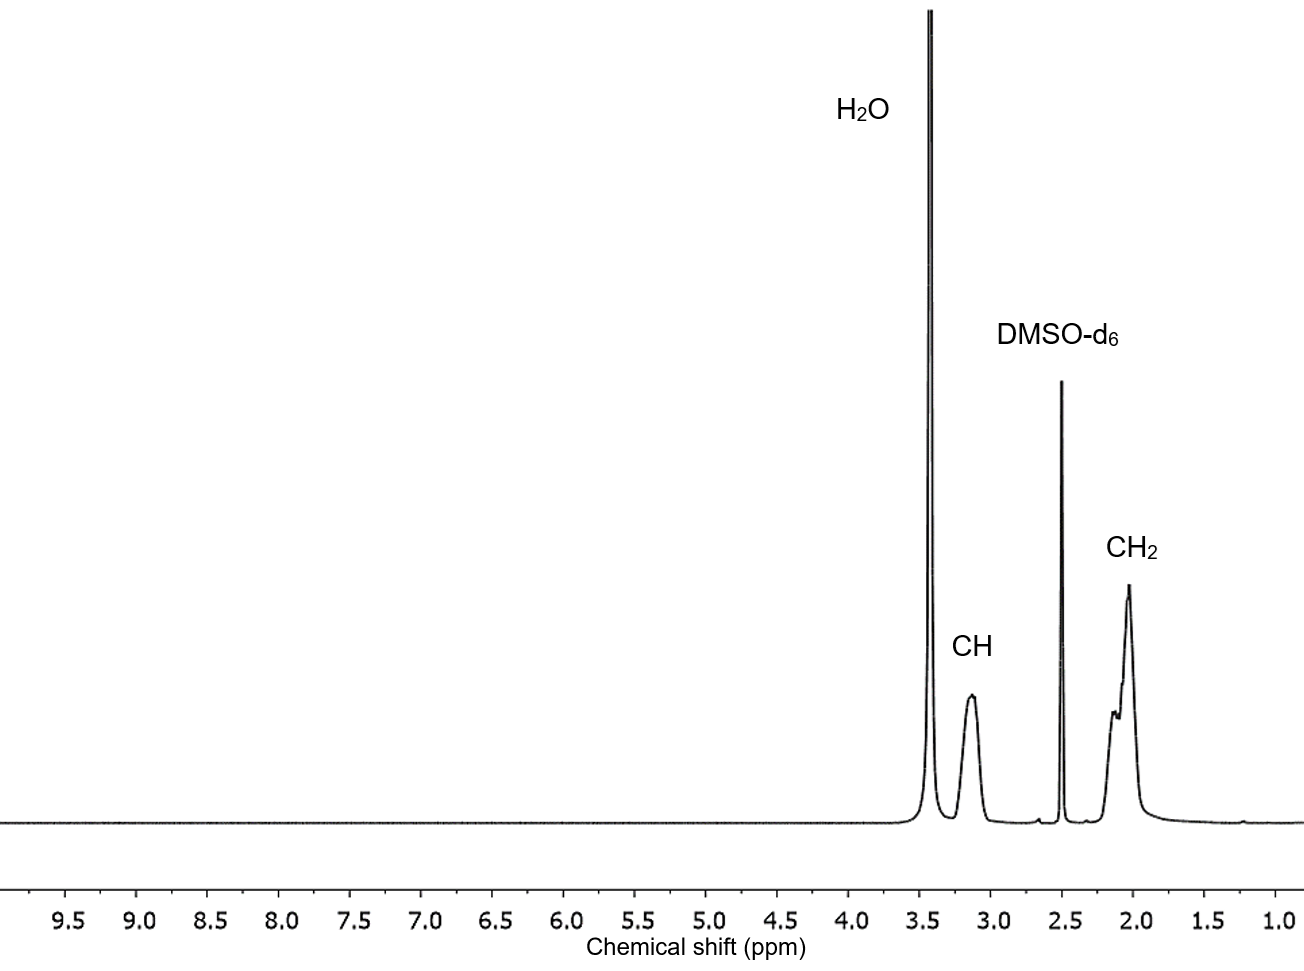


Figure SI.4 – 1H-NMR spectrum of PAN.


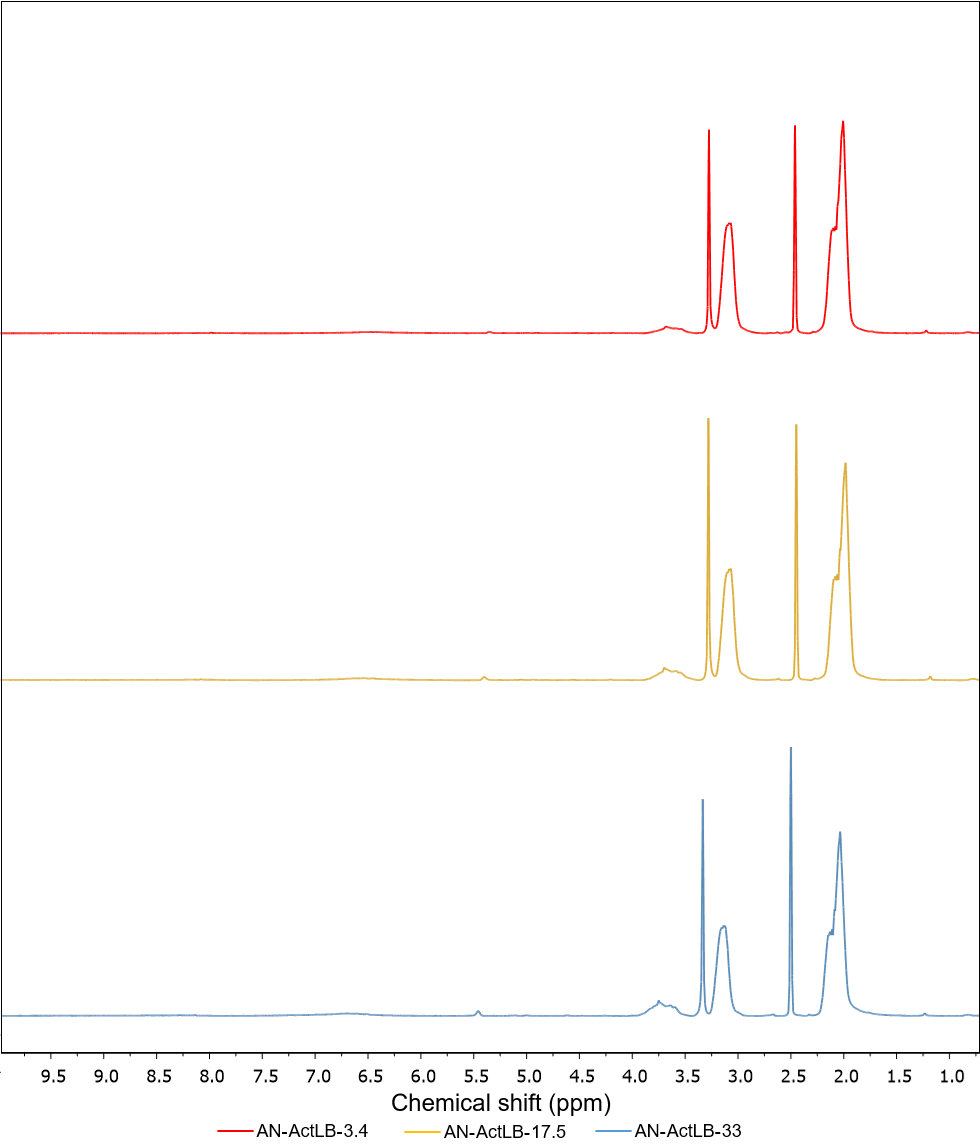


Figure SI.5 – 1H-NMR spectra of pure LB copolymers.
